# Supplementary material for: Fibrillar form of α-synuclein-specific scFv antibody inhibits α-synuclein seeds induced aggregation and toxicity
Source: PubMed Central journal article supplement (PMC7235225; doi:10.1038/s41598-020-65035-8), 2020-05-18

## Fibrillar form of $\alpha$ -synuclein-specific scFv antibody inhibits $\alpha$ -synuclein seeds induced aggregation and toxicity

Vijay Gupta<sup>1#</sup>, Safa Salim<sup>1#</sup>, Issam Hmila<sup>1#</sup>, Nishant N. Vaikath<sup>1#</sup>, Indulekha P. Sudhakaran<sup>1</sup>, Simona Ghanem<sup>1</sup>, Nour K. Majbour<sup>1</sup>, Sara A. Abdulla<sup>1</sup>, Mohamed M. Emar<sup>4</sup>, Houari B. Abdesselem<sup>1</sup>, Tamas Lukacsovich<sup>3</sup>, Daniel Erskine<sup>2</sup>, Omar M. A. El-Agnaf<sup>1\*</sup>

- 1 Neurological Disorder Research Center, Qatar Biomedical Research Institute (QBRI), Hamad Bin Khalifa University (HBKU), Qatar Foundation, Doha, Qatar.
- 2 Translational and Clinical Research Institute, Newcastle University, UK.
- 3 Brain Research Institute, University of Zürich, Switzerland.
- 4 Basic Medical Sciences Department, College of Medicine, QU Health, Qatar University, Doha, Qatar.

**\*Corresponding author:** Omar El-Agnaf, Qatar Biomedical Research Institute, Hamad Bin Khalifa University, P.O. Box 34110, Doha, Qatar. Tel: +97455935568; Fax: +974 445 41770;  
E-mail: [uelagnaf@qf.org.qa](mailto:uelagnaf@qf.org.qa)

# denotes equal authorship.

**a**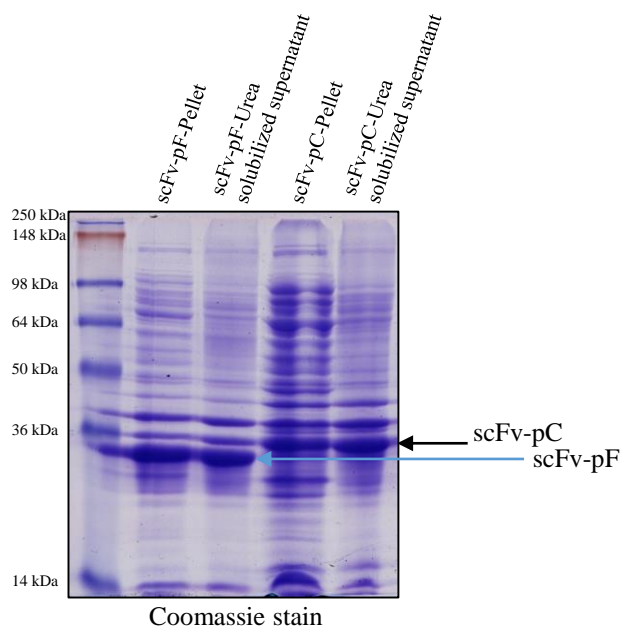**b**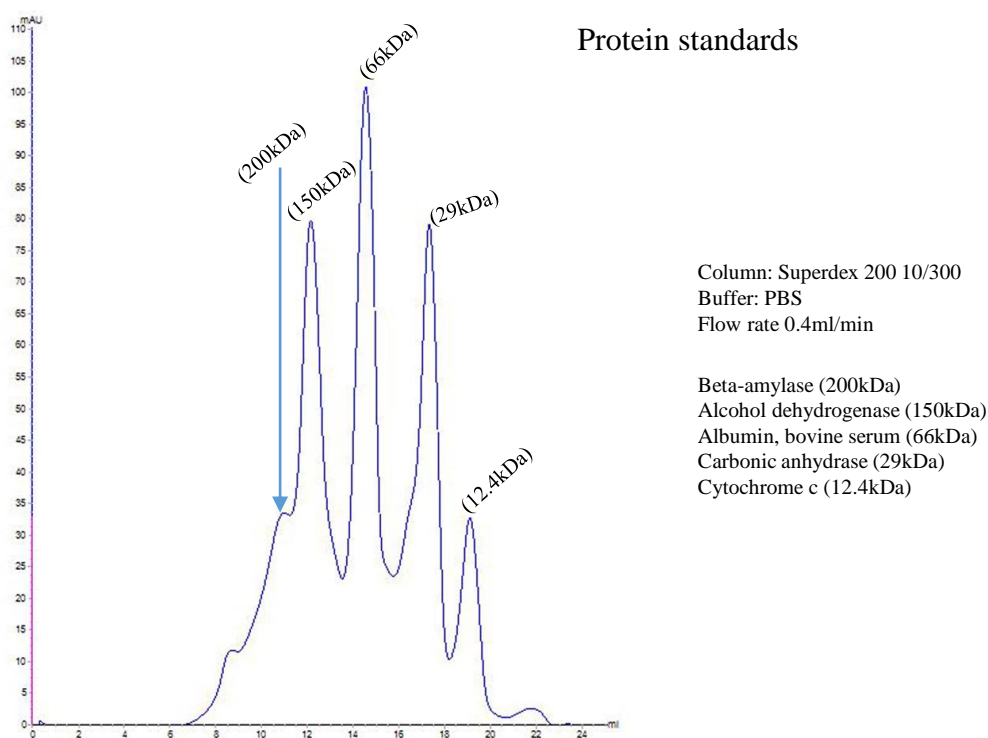

**Suppl. Fig. S1. Protein yield of scFv-pF and scFv-pC fusion proteins during urea solubilization and size exclusion chromatography.** (a) Inclusion body pellets (suspended in 50 ml -1x PBS per liter) from scFv-pF and scFv-pC protein's expression were washed with 1M urea + 1% Triton-X 100 solution five times and then with 1X PBS solution and solubilized in 2M urea, pH-12.5 solution for 2-3 hours (25 ml per liter). SDS-PAGE analysis of expression of scFv-pF and -pC in inclusion body pellet after E.coli lysis (inclusion body pellet) is compared with 2M urea, pH-12.5 solubilization in equal amounts. scFv-pF and -pC are indicated by an arrow and show around 50% recovery. (b) Size exclusion chromatography showing the control run wherein Beta-amylase (200kDa), Alcohol dehydrogenase (150kDa), Albumin, bovine serum (66kDa), Carbonic anhydrase (29kDa) and Cytochrome c (12.4kDa) were used as protein standard controls.

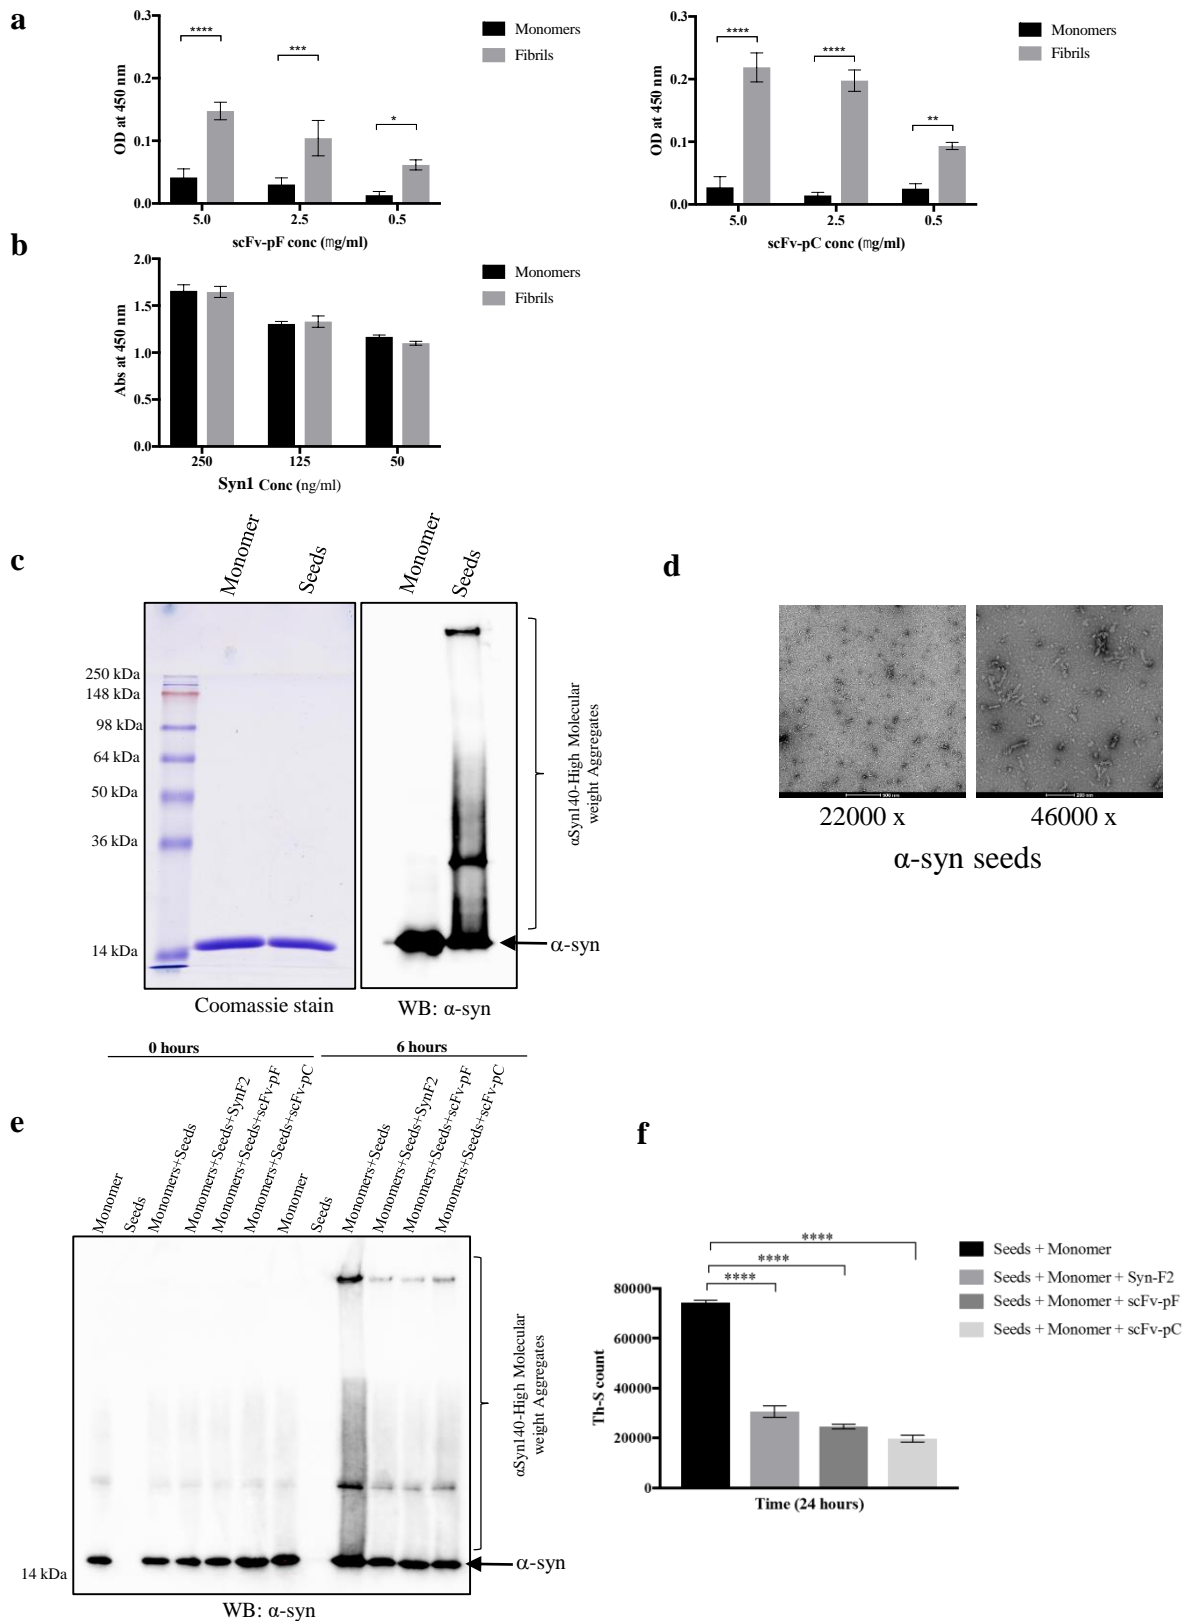

**Suppl. Fig. S2. Characterization of scFvs and their effect on seeded aggregation.** ELISA showing specific binding of scFv-pF and -pC to fibrillar form of  $\alpha$ -syn. 100ng of  $\alpha$ -syn monomers or fibrils were coated on a 96-well MaxiSorp plate and indirect ELISA was performed using indicated concentrations of scFv-pF/-pC(a) or Syn-1(b). Statistical analysis was performed using one-way ANOVA with Dunnet's multiple comparison test. (\*\*\*\*,  $p < 0.001$ ; \*\*,  $p < 0.01$ ; \*,  $p < 0.05$ ). (c) SDS-PAGE analysis of 10  $\mu$ g  $\alpha$ -syn monomers and seeds in denaturing sample buffer with SDS and boiling (left panel) show a single band and did not show the presence of any impurity. Right panel show western blotting of 100 ng  $\alpha$ -syn monomers and seeds in non-denaturing sample buffer (without any boiling and SDS) using  $\alpha$ -syn specific antibody (FL140, Santa Cruz) as shown earlier<sup>39</sup>. The presence of high molecular weight aggregates and insoluble aggregates that do not enter the stacking gel is clearly visible in seeds. (d) Electron microscopy images of negatively stained  $\alpha$ -syn seeds (70 $\mu$ M) show their uniformity and small size in the range of  $\sim$ 50-200nm. Scale bar = 500nm and 200nm. (e) 1 $\mu$ l protein samples at 0 hours and 6 hours time-points from the experiments shown in Fig. 2b were prepared in non-denaturing sample buffer (without any boiling and SDS) and loaded on SDS-PAGE and western blotting was performed using  $\alpha$ -syn specific antibody (FL140, Santa Cruz). (f) *In vitro* seeding of  $\alpha$ -syn aggregation showing inhibition by Syn-F2, scFv-pF and -pC at 24 hours as described in Fig. 2b.

a

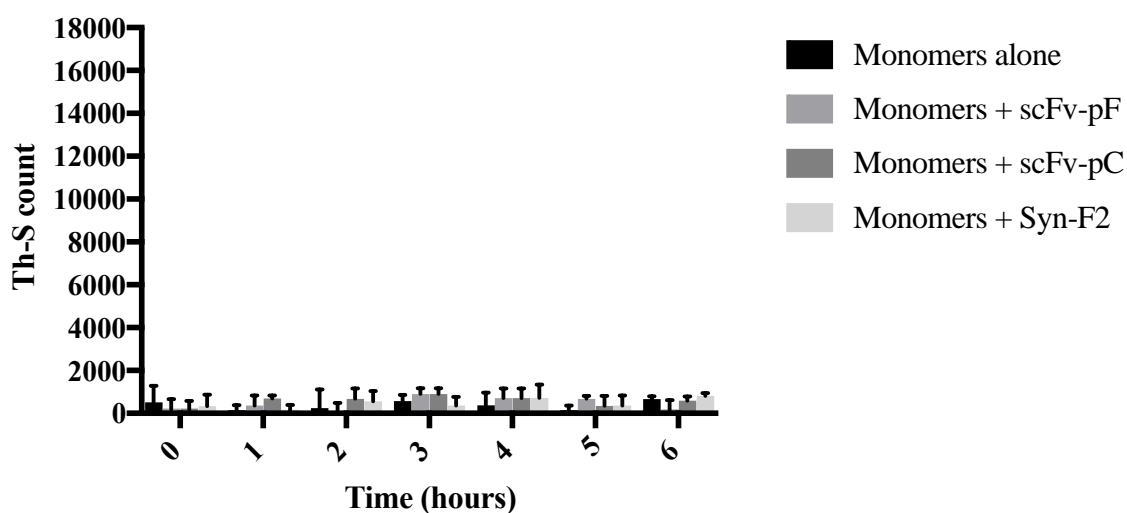

b

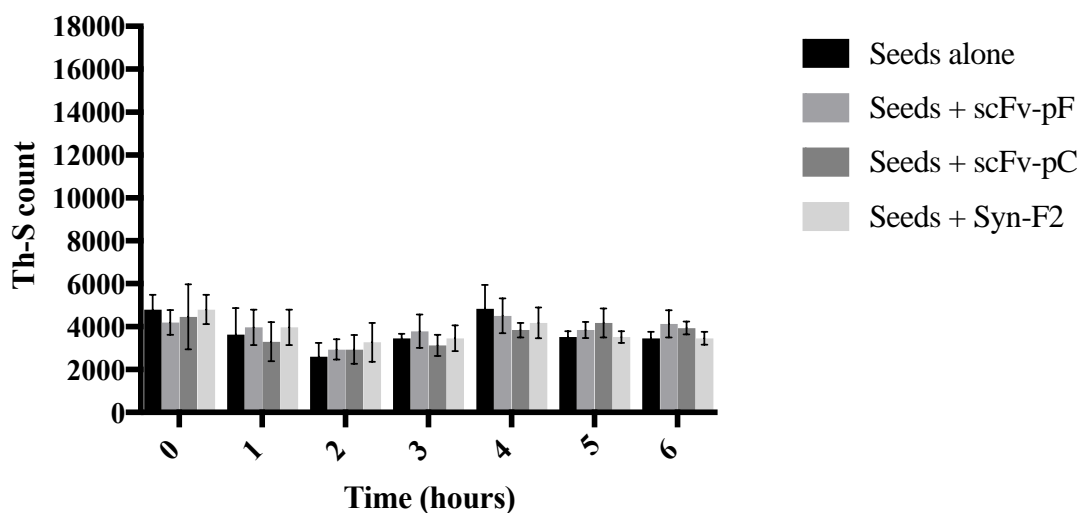

**Suppl. Fig. S3. Th-S fluorescence assay showing the extent of fibrillation in  $\alpha$ -syn monomers or seeds alone or with Syn-F2 and scFv-pF/-pC.**  $\alpha$ -syn monomers (25 $\mu$ M) (a) or seeds (1 $\mu$ M) (b) were incubated alone or with Syn-F2 (1 $\mu$ M), scFv-pF (40  $\mu$ M) and scFv-pC (8  $\mu$ M). The extent of fibrillation was estimated by the Th-S fluorescence assay at indicated time-points.  $\alpha$ -syn monomers showed negligible counts up to six hours which did not increase by incubating with Syn-F2 or scFv-pF/-pC (a). On the other hand,  $\alpha$ -syn seeds had a basal Th-S count of 4000-6000 which did not change with increasing time or by incubating with Syn-F2 or scFv-pF/-pC (b). The assay was performed in triplicate (average of triplicate measurements  $\pm$  standard deviations).

**a**

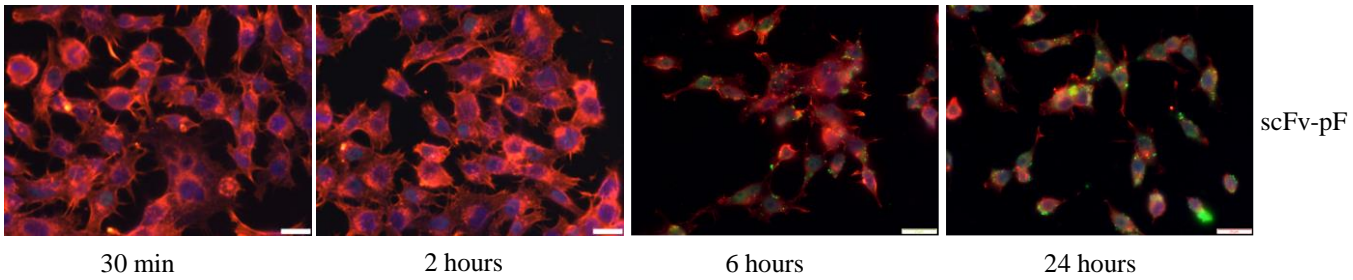

**b**

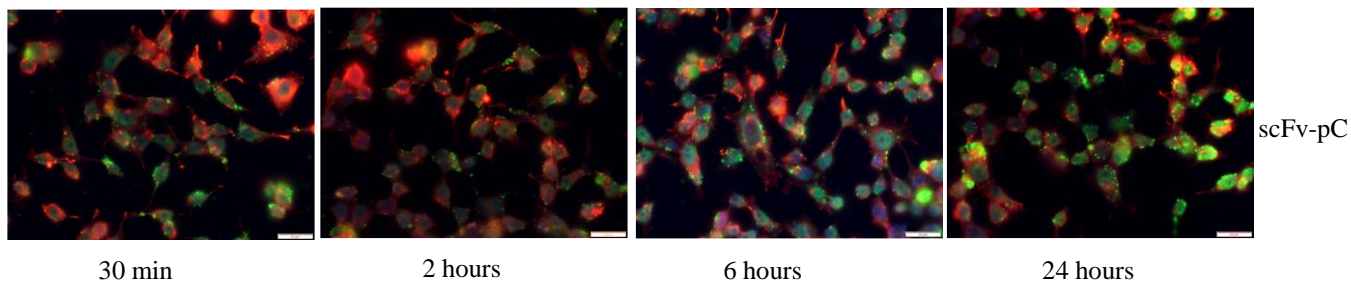

**Suppl. Fig. S4. Localization of scFv-pF/pC upon incubating with SH-SY5Y cells at different time-points.** SH-SY5Y cells were incubated with scFv-pF and scFv-pC in Opti-MEM at 2 $\mu$ g/ml for 30min, 2hours, 6 hours and 24 hours and fixed and stained using anti-His antibody and Phalloidin-594 and imaged using wide-field microscope. scFv-pF did not show any specific staining pattern at initial time-points of 30min and 2 hours, however at later time points of 6 hours and 24 hours it started showing cell membrane binding whereas on the other hand scFv-pC showed specific staining pattern around the cells at all time-points indicating efficient membrane binding and intracellular delivery. Scale bars = 10 $\mu$ m.

**a**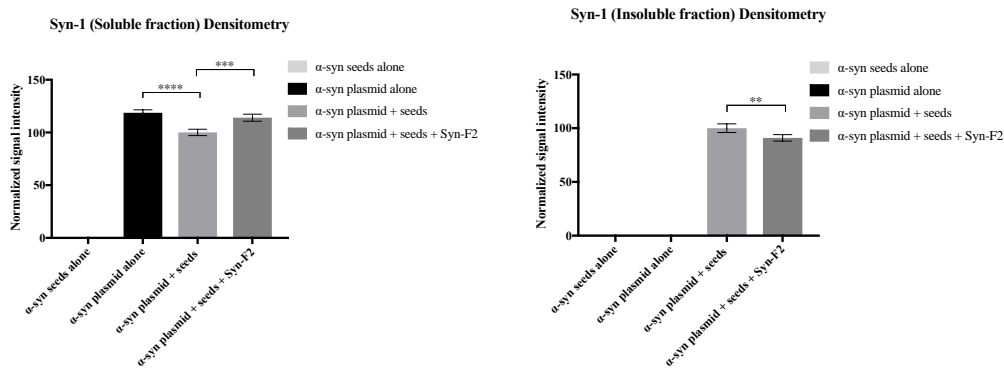**b**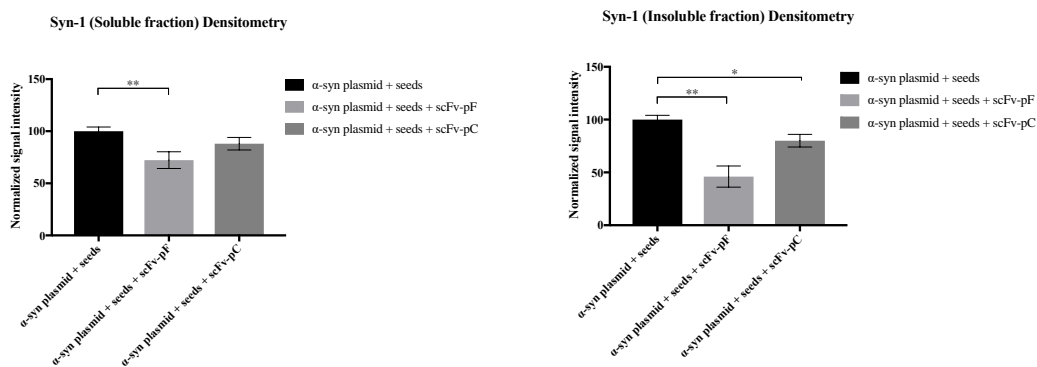**c**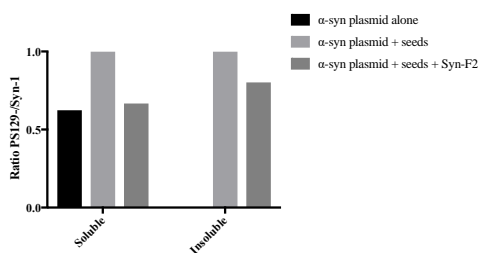**d**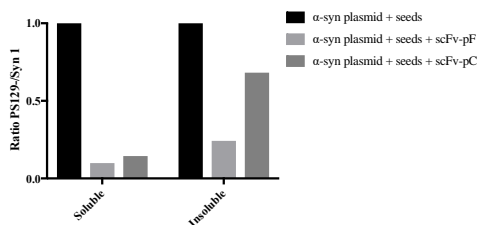

**Suppl. Fig. S5. Syn-F2, scFv-pF and scFv-pC decrease aggregated  $\alpha$ -syn in HEK293T cell model of PD.** Western blotting data from Fig. 5 was quantified using densitometric analysis and Syn-1 protein levels were plotted from Fig. 5a in (panel a) and Fig. 5b in (panel b). Ratios of pSer129 to Syn-1 were plotted from Fig. 5a in (panel c) and Fig. 5b in (panel d). Statistical analysis was performed using one-way ANNOVA with Dunnet's multiple comparison test. ((\*\*\*,  $p < 0.0001$ , \*\*\*,  $p < 0.001$ ; \*\*,  $p < 0.01$ ).

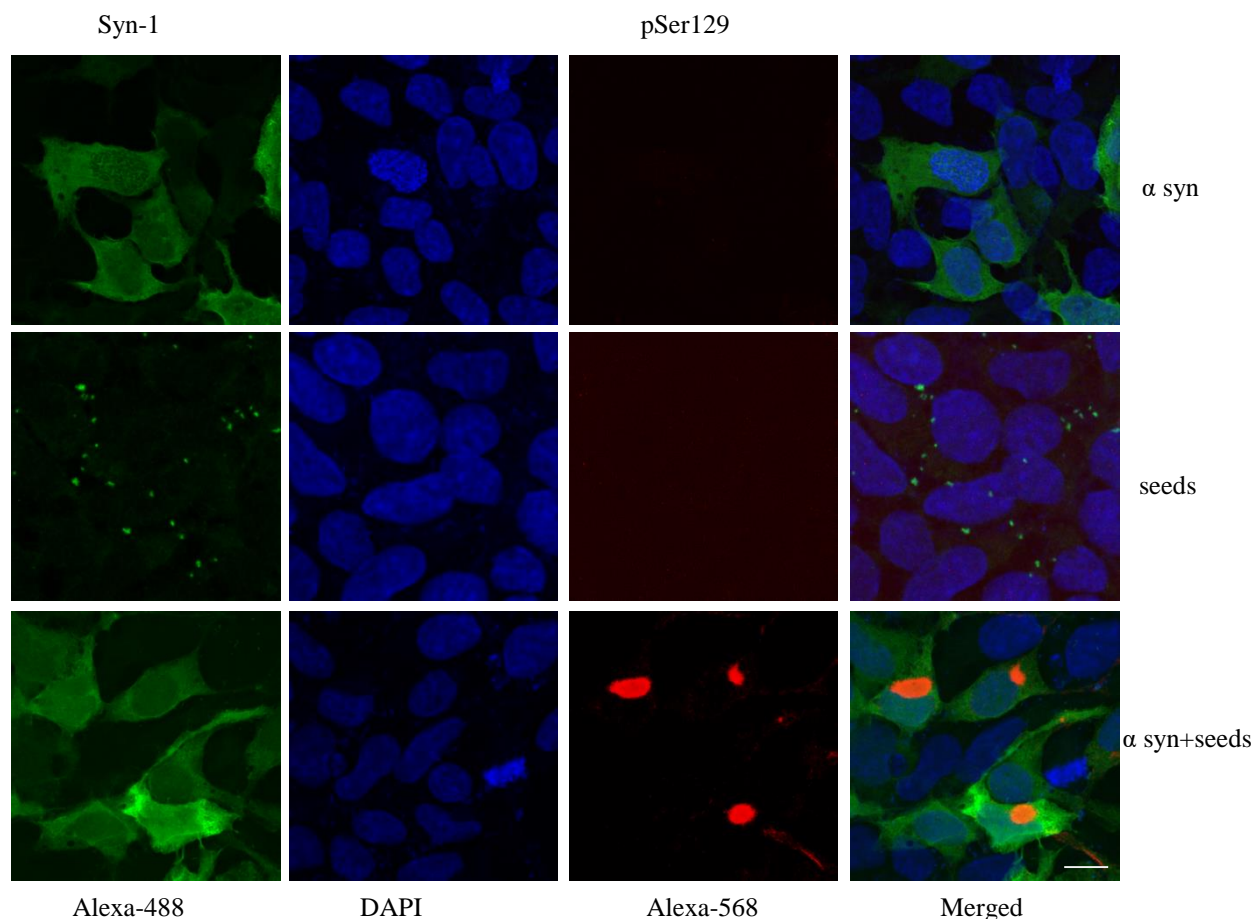

**Suppl. Fig. S6. Immunocytochemistry images showing the formation of  $\alpha$ -syn aggregates in HEK293T cells.** HEK293T cells were transfected with wild type  $\alpha$ -syn plasmid and similarly with 0.2 $\mu$ M  $\alpha$ -syn seeds the following day and then incubated for next 48 hours. As controls one group of cells was either transfected with  $\alpha$ -syn plasmid or  $\alpha$ -syn seeds (0.2 $\mu$ M). Cells were fixed and co-stained using anti-pSer129 antibody (Alexa-568) and  $\alpha$ -syn specific antibody (Syn-1) (Alexa-488) and imaged using confocal microscope. Serial optical sections in the Z-axis of the cell, collected at 1  $\mu$ m intervals with 63 $\times$  oil immersion objective lense (NA 1.4) were projected and observed in a total thickness of 10  $\mu$ m by using LSM 780 (version 3.2) software. Cells transfected with  $\alpha$ -syn plasmid shows diffused cytosolic expression and seeds show small aggregates inside and around cells. However, upon co-incubation of  $\alpha$ -syn plasmid with  $\alpha$ -syn seeds, bigger aggregate formation is detected by pSer129 antibody.  $\alpha$ -syn plasmid or  $\alpha$ -syn alone do not show pSer129 antibody staining indicating the absence of phosphorylated aggregated forms. Scale bars = 10 $\mu$ m.

### **Amino acid sequence of scFv-pF**

MMSPAQFLFLLVLWIQETNGDVVMTQTPLTLSVTIGQPASISCKSSQSLLYSNGKTYLNWLLQ  
RPGQSPKRLIYLVSKLDSGVPDRFTGSGSGTDFTLKISRVEAEDLGVYYCVQGTHFPTFGGGT  
KLEIK**GGGGSGGGGSGGGGS**MDSRLNLVFLVLILKGVQCDVQLVESGGGLVQPGGSRKLSC  
AASGFTFSSFGMHWVRQAPEKGLEWVAYISSGSSTIYYADTVKGRFTISRDNPKNTLFLQMTS  
LRSEDTAMY<sup>3</sup>YCARGNNPGTG<sup>4</sup>YYYAMDYWGQGTSVTVSSLVPRGSLE**HHHHHH**

### **Amino acid sequence of scFv-pC**

**RQIKIWFQNRRMKWKK**MMSPAQFLFLLVLWIQETNGDVVMTQTPLTLSVTIGQPASISC  
KSSQSLLYSNGKTYLNWLLQRPGQSPKRLIYLVSKLDSGVPDRFTGSGSGTDFTLKISRVEA  
EDLGVYYCVQGTHFPTFGGGTKLEIK**GGGGSGGGGSGGGGS**MDSRLNLVFLVLILKGVQ  
CDVQLVESGGGLVQPGGSRKLSCAASGFTFSSFGMHWVRQAPEKGLEWVAYISSGSSTIYY  
ADTVKGRFTISRDNPKNTLFLQMTSLRSEDTAMY<sup>3</sup>YCARGNNPGTG<sup>4</sup>YYYAMDYWGQGTS  
VTVSSLVPRGSLE**HHHHHH**

**Suppl. Fig. S7.** Amino acid sequences translated from the coding sequence of scFv-pF and scFv-pC is presented. Cell penetrating peptide-16 amino acid long, (Gly<sub>4</sub>Ser)<sub>3</sub> and 6X-His tag is in bold letters.



Manuscript Figure 5 B: Soluble Fraction: Full Blot scan

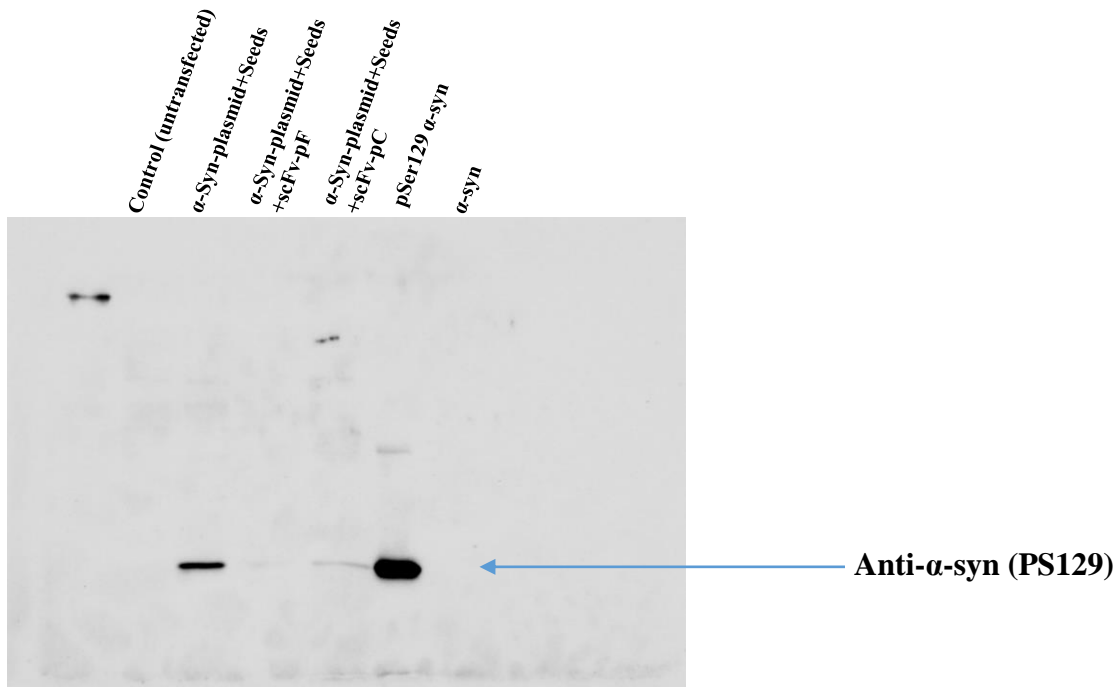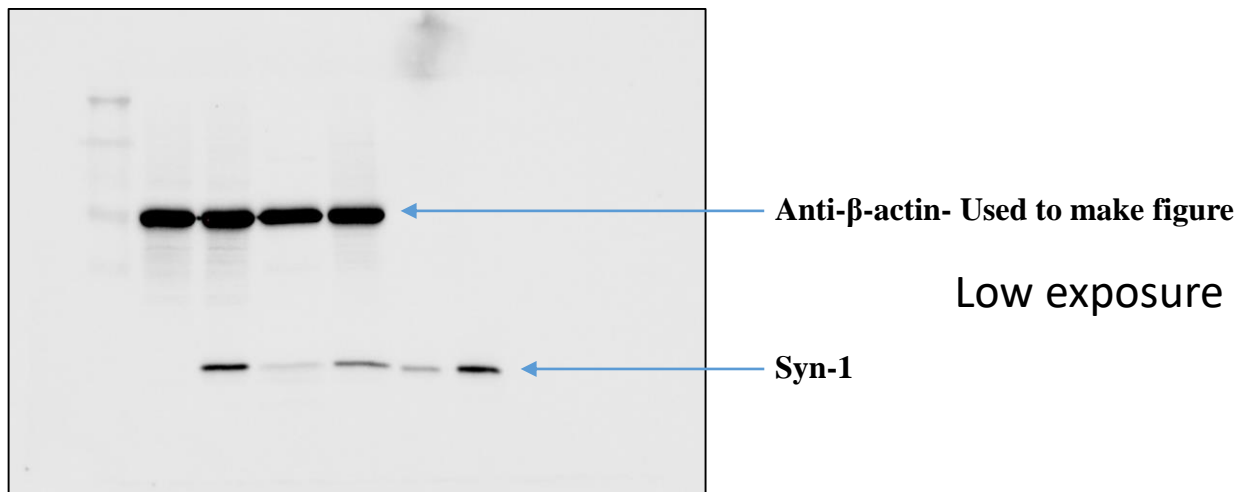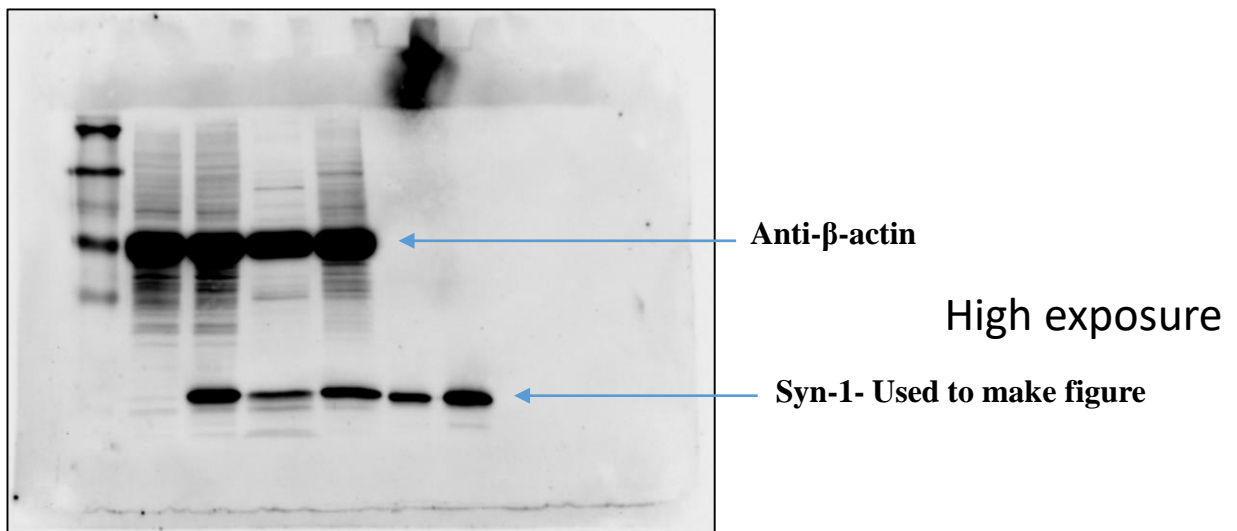

**Manuscript Figure 5 B: Insoluble Fraction: Full Blot scan**

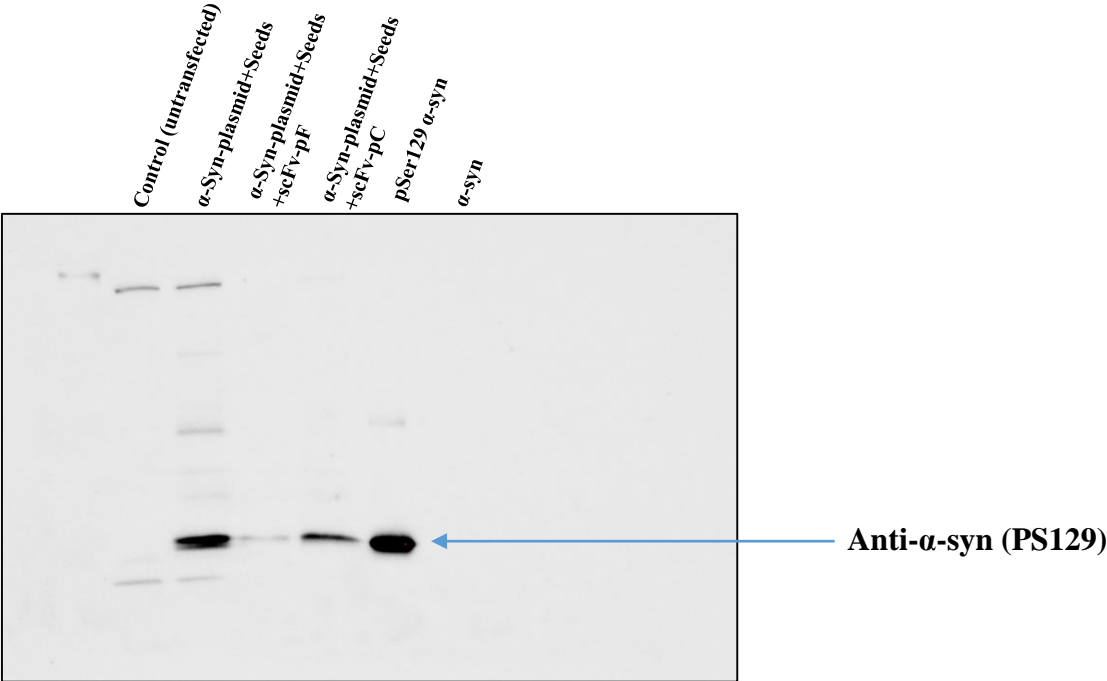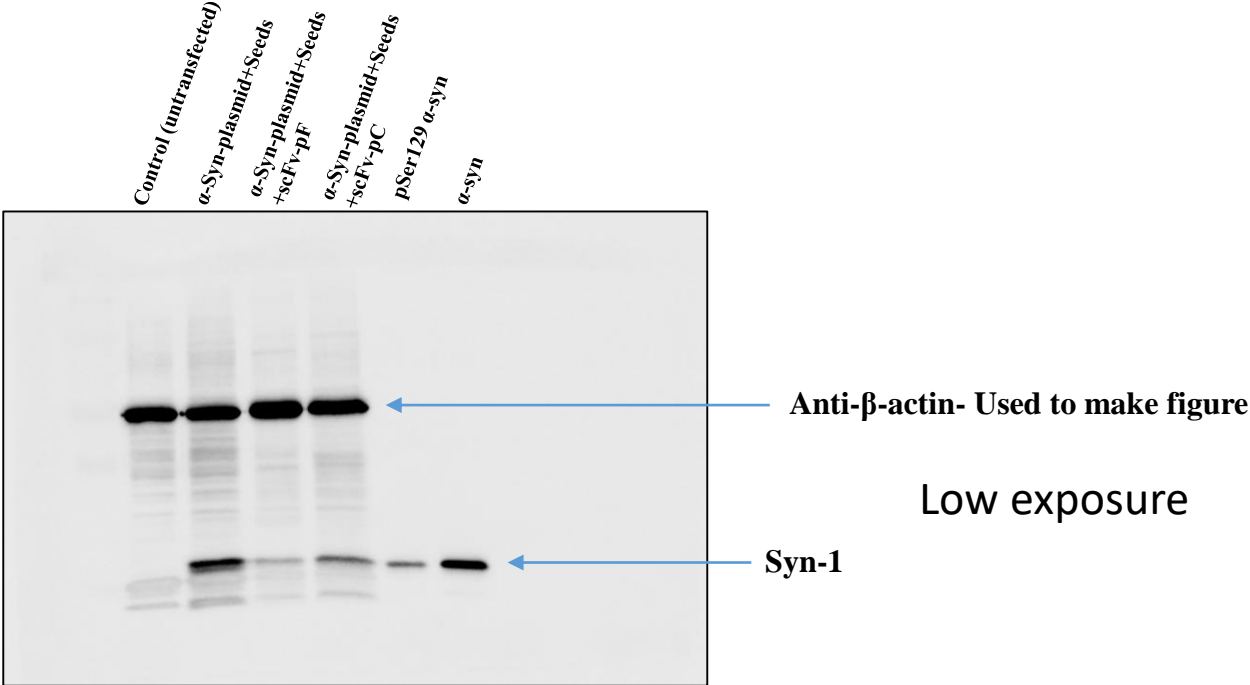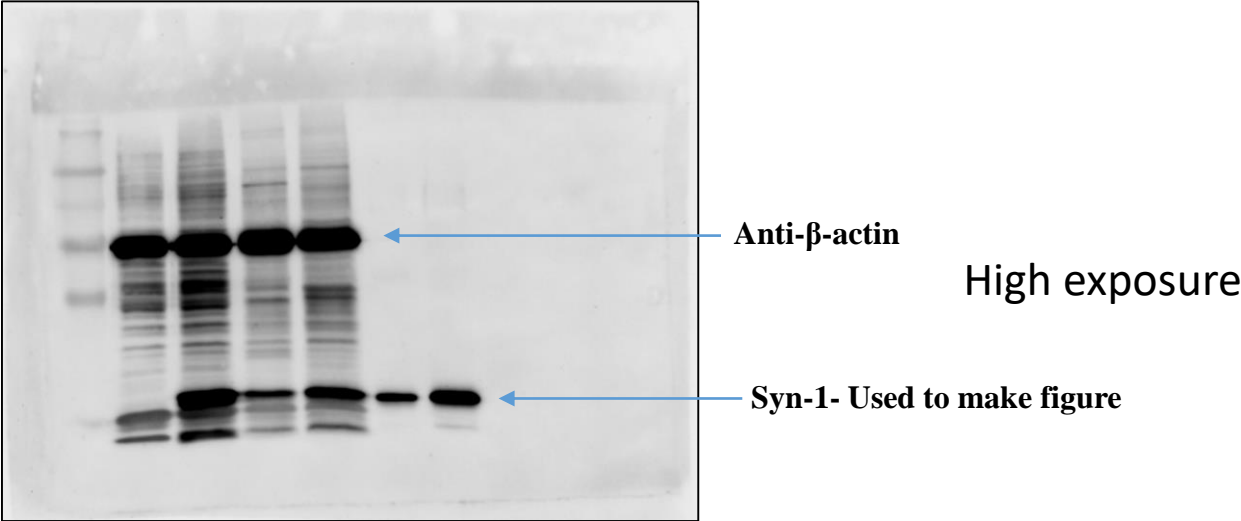

Manuscript Figure 5 A: Soluble Fraction: Full Blot scan

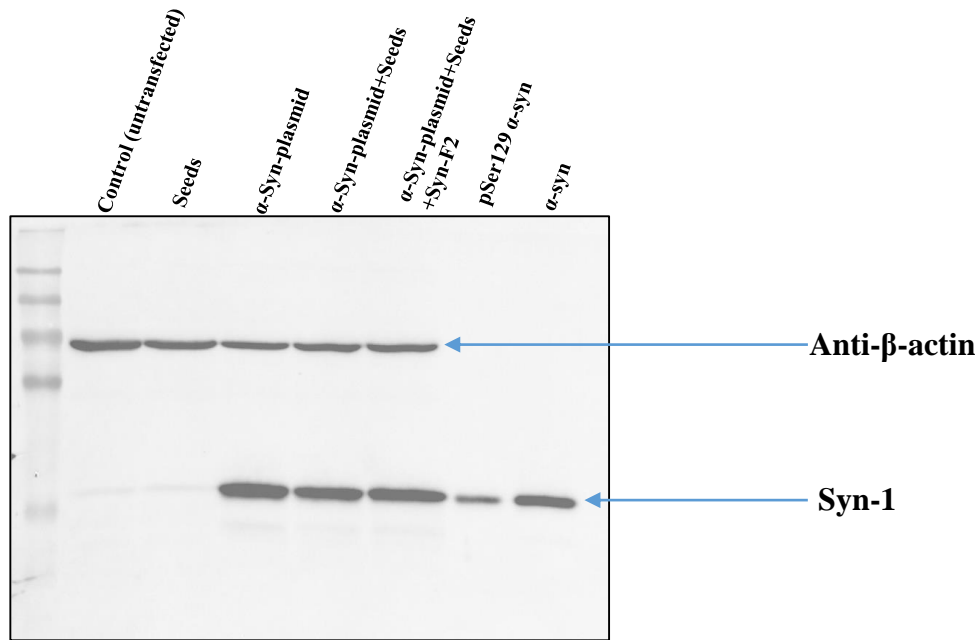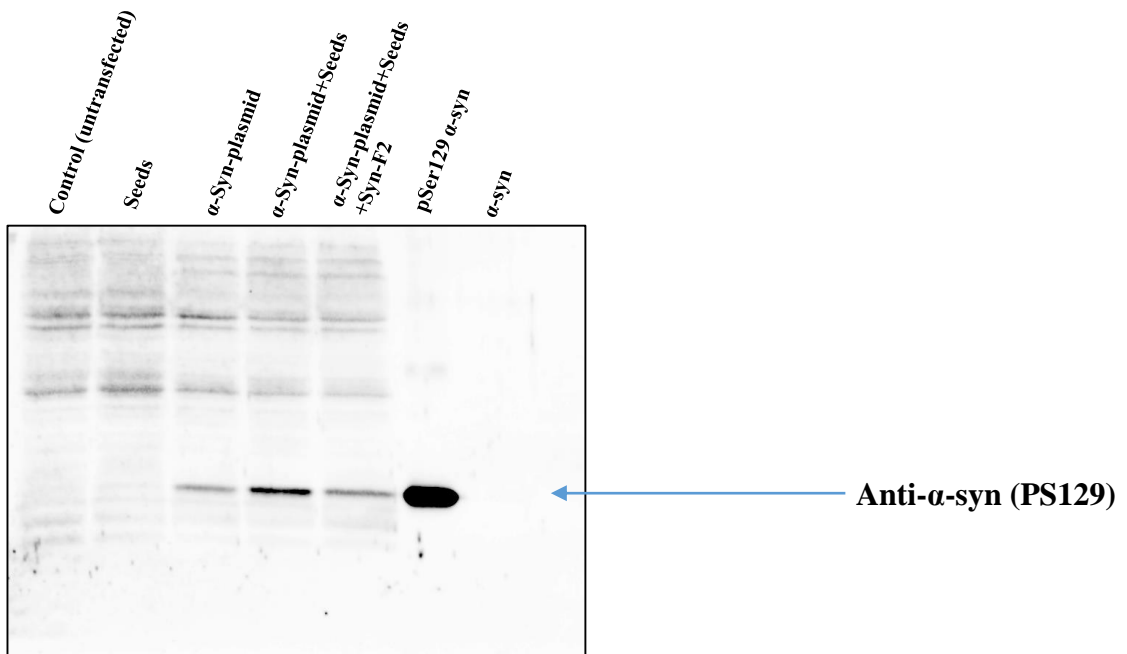

Manuscript Figure 5 A: Insoluble Fraction: Full Blot scan

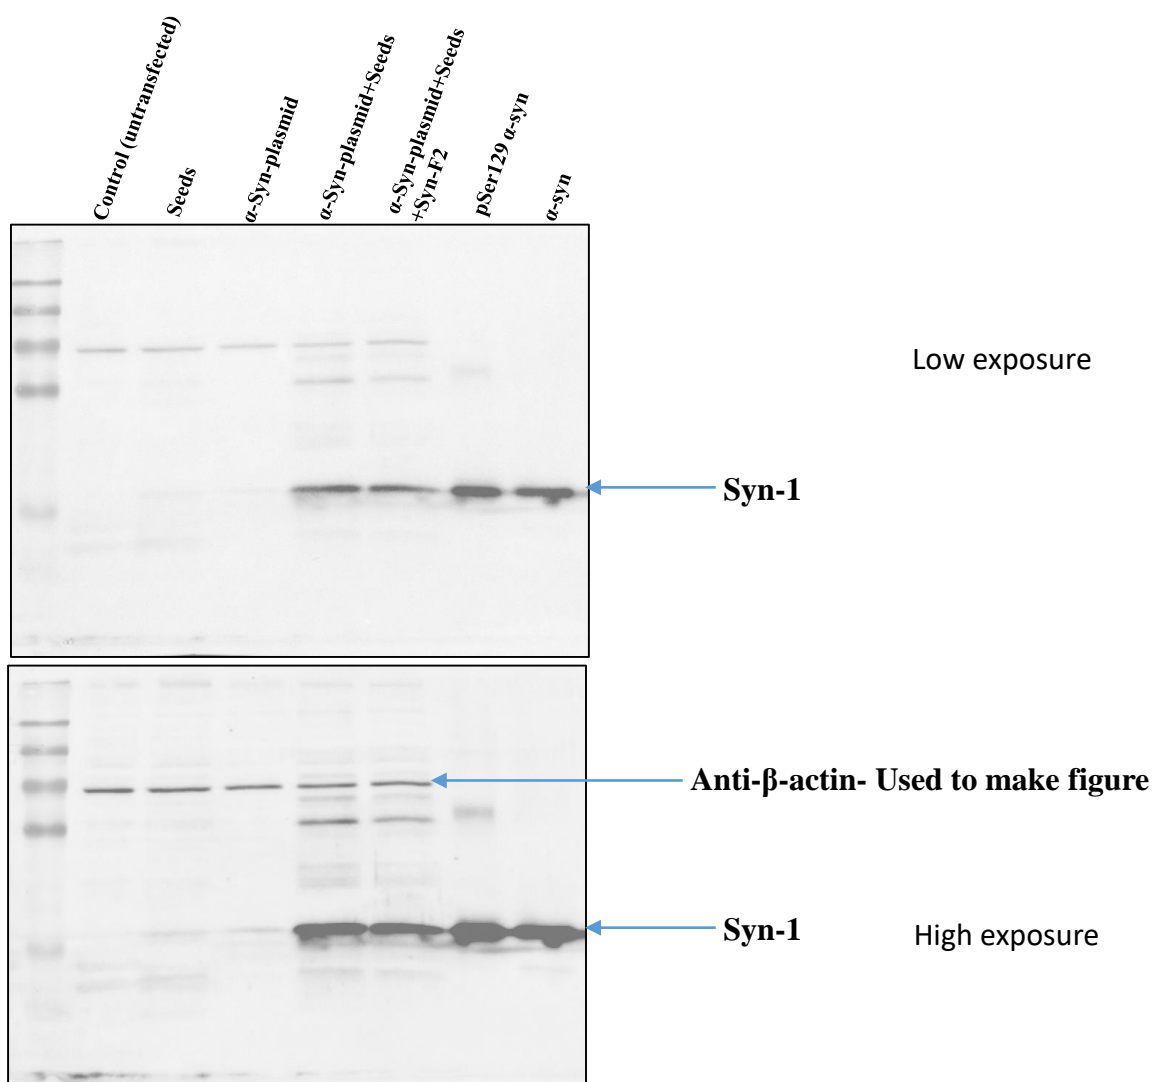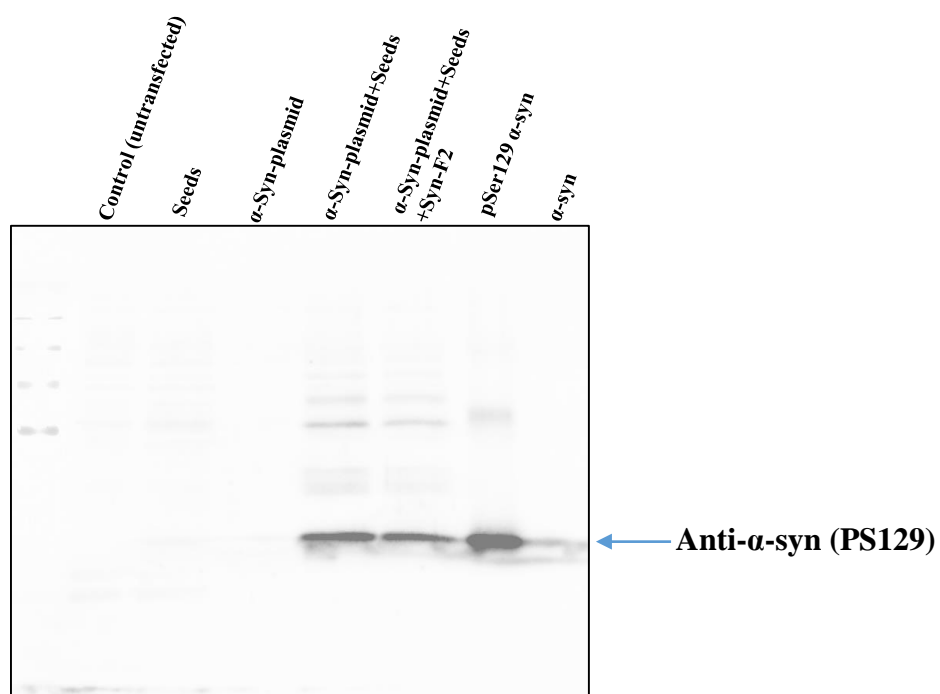

Supplement: 41598_2020_65035_MOESM1_ESM.pdf [file 41598_2020_65035_MOESM1_ESM.pdf]
